# Supplementary material for: Wearable Intelligent Detection System for Large-Scale Applications
Source: Research Square preprint supplement (doi:10.21203/rs.3.rs-6392445/v1), 2025-05-06
Supplement: Supplementary file 1 [file eb9b3991091a067c73d5c9ad.xlsx]

## Sheet: Sheet1
experimental rounds	Runtime (minutes)	Theoretical data packets received	Lost packets	Packet loss rate (%)
1	10	2400	12	0.005
2	10	2400	0	0
3	10	2400	0	0
4	10	2400	0	0
5	10	2400	0	0
